# Supplementary material for: Impact of Drought on Global Food Security by 2050
Source: Research Square preprint supplement (doi:10.21203/rs.3.rs-5146551/v1), 2024-10-22
Supplement: Supplementary file 1 [file 1ad920f7c84285480b62a8a0.xlsx]

## Sheet: Master
Country Name	Classification	GDP per capita	Population 2045_2049	MR	GDP_Factor	Big 4 Imports (1000 t)	Big 4 Imports per Capita	Big 4 Exports (1000 ha)	Big 4 Exports per Capita	Big 4 Total Production (1000 t)	Big 4 Import Fraction	Big 4 Production Fraction	Import_Factor	Population_Change	Population_factor	VI
Afghanistan	Low income	521.18	54508.8	-2.82586	1.91872	3420.6	0.0627531	0.6	1.10074e-05	4989.2	40.6769	36.781	0.593231	60	1.6	1.82119
Albania	Upper-Middle income	4658.36	2755.18	-14.0398	0.214668	588.2	0.213489	7.4	0.00268585	644.8	47.9928	14.7821	0.520072	-5	0.95	0.106061
Algeria	Upper-Middle income	4098.66	55330.7	-42.4969	0.243982	12500	0.225914	6.8	0.000122897	3082.4	80.2537	10.1258	0.197463	35	1.35	0.0650395
Angola	Lower-Middle income	2439.64	61172.2	-6.95009	0.409897	1998	0.0326619	31.8	0.000519844	2466.4	45.0751	8.19969	0.549249	129	2.29	0.51556
Argentina	Upper-Middle income	12590.3	54683.2	-23.6793	0.0794265	2370.75	0.0433543	44679.6	0.817063	116051	3.21492	55.1124	0.967851	24	1.24	0.0953225
Armenia	Upper-Middle income	4121.7	2778.08	-5.84929	0.242618	117.7	0.0423674	2.2	0.000791913	251	32.1146	8.24654	0.678854	-8	0.92	0.151526
Australia	High income	54591.1	32759.2	-19.8349	0.018318	1399	0.0427055	16423.4	0.501337	24218.4	15.2164	18.7113	0.847836	33	1.33	0.0206558
Austria	High income	47693.4	8868.12	-2.69727	0.0209673	3011.6	0.339599	1861.4	0.209898	3875	59.93	19.2582	0.4007	3	1.03	0.00865365
Azerbaijan	Upper-Middle income	4614.8	10991.3	-6.08708	0.216694	1641.6	0.149355	3.25	0.000295689	2113.8	43.7509	17.8848	0.562491	10	1.1	0.134077
Bangladesh	Lower-Middle income	1759.42	201223	-2.9632	0.568369	8134	0.0404228	65.4	0.000325013	57331.2	12.4373	50.6145	0.875627	22	1.22	0.607168
Belarus	Upper-Middle income	5998.06	8235.47	-7.91032	0.166721	704.6	0.0855567	114.2	0.0138668	3174.2	18.7165	10.2677	0.812835	-13	0.87	0.117899
Belgium	High income	44281.2	12471.7	-7.14184	0.0225829	11420.6	0.91572	4788.8	0.383973	2246.8	128.631	8.01889	0	9	1.09	0
Belize	Upper-Middle income	6076.64	573.05	-21.6364	0.164565	28.8	0.0502574	8.8	0.0153564	94.2	25.2189	3.50224	0.747811	53	1.53	0.188287
Benin	Lower-Middle income	1110.42	21503	-9.85627	0.90056	2455.4	0.114189	5	0.000232526	1955.6	55.7286	12.7899	0.442714	88	1.88	0.749539
Bhutan	Lower-Middle income	3191.34	945.887	-14.8306	0.313348	204	0.215671	2	0.00211442	97	68.2274	30.8711	0.317726	17	1.17	0.116484
Bolivia	Lower-Middle income	3242.5	15601.3	-6.72338	0.308404	642.8	0.0412016	63.3	0.00405735	4814.8	11.9163	19.898	0.880837	41	1.41	0.383032
Bosnia and Herzegovina	Upper-Middle income	5403.7	3151.17	-6.78407	0.185058	1141.4	0.362215	195.4	0.0620087	1328.6	50.1803	31.4675	0.498197	-17	0.83	0.0765224
Botswana	Upper-Middle income	6525.12	3316.1	-16.2443	0.153254	1281.8	0.386539	86.2	0.0259944	9.6	106.356	1.14668	0	42	1.42	0
Brazil	Upper-Middle income	9065.38	238047	-5.55477	0.11031	9764.8	0.0410205	98002.4	0.411694	211404	7.92811	17.1827	0.920719	13	1.13	0.114768
Brunei	High income	29523.8	542.199	-1.12309	0.0338709	NA	NA		NA	NA	NA	NA	#VALUE!	-25	0.75	#VALUE!
Bulgaria	High income	8470.74	5309.9	-22.6215	0.118053	501	0.094352	6103.8	1.14951	8882	15.2781	53.9583	0.847219	-25	0.75	0.0750128
Burkina Faso	Low income	710.7	40321	-7.28983	1.40706	1050.6	0.0260559	41.6	0.00103172	1985.6	35.0831	13.6106	0.649169	110	2.1	1.91818
Burundi	Low income	245.02	26761.2	-6.01357	4.0813	145	0.0054183	17.4	0.000650196	372	29.0232	4.80742	0.709768	124	2.24	6.48878
Cambodia	Lower-Middle income	1411.48	22112	-15.0382	0.708476	489.2	0.0221237	848.4	0.0383683	11179.2	4.52126	34.7802	0.954787	38	1.38	0.933493
Cameroon	Lower-Middle income	1487.7	45948.8	-8.0943	0.672179	1832.8	0.0398879	33.8	0.000735602	2506	42.5738	7.67806	0.574262	87	1.87	0.721833
Canada	High income	44792.8	43663.9	-4.36507	0.022325	6125.2	0.140281	30296.6	0.693859	51720	22.2342	38.6864	0.777658	19	1.19	0.0206599
Central African Republic	Low income	400.2	8435.8	-9.38454	2.49875	47	0.0055715	1	0.000118542	107	30.719	2.49011	0.69281	65	1.65	2.85641
Chad	Low income	710.24	33022.5	-4.0925	1.40797	117.6	0.0035612	2	6.05647e-05	673.8	14.8974	8.62286	0.851026	121	2.21	2.64807
Chile	High income	14568.5	21502.3	-11.7148	0.0686413	3536.6	0.164476	200.8	0.00933855	2825.2	57.403	11.3782	0.42597	17	1.17	0.0342098
China	Upper-Middle income	8995.42	1.36454e+06	-2.0011	0.111168	111103	0.081422	3783.4	0.00277266	623354	15.2056	27.8481	0.847944	-2	0.98	0.0923787
Colombia	Upper-Middle income	6366.7	54983.8	-1.4574	0.157067	8091	0.147152	117	0.0021279	4432.6	65.2153	5.05385	0.347847	12	1.12	0.0611916
Costa Rica	Upper-Middle income	12120.1	5738.79	-2.4809	0.0825078	1734.8	0.302294	6039.53	1.05241	28368.1	7.20929	187.895	0.927907	17.0098	1.1701	0.0895823
Croatia	High income	13686.3	3620.16	-22.3474	0.0730657	487.2	0.13458	1250.6	0.345455	11964.4	4.34961	170.213	0.956504	-14	0.86	0.0601033
Cuba	Upper-Middle income	8450.84	10532.9	-25.511	0.118331	3715	0.352706	0	0	16090.4	18.7575	101.315	0.812425	-7	0.93	0.0894059
Czechia	High income	20826.1	10032.9	-1.46051	0.0480167	962	0.0958849	3039.8	0.302984	5579.2	27.4747	24.0124	0.725253	-5	0.95	0.033083
Democratic Republic of the Congo	Low income	502.26	NA	-2.03842	1.991	NA	NA	6913.3	NA	76677.5	0	110.046	1	NA	#VALUE!	#VALUE!
Denmark	High income	57342.8	6261.69	-3.02486	0.017439	1401.4	0.223805	1274.8	0.203587	4315	31.5517	15.1509	0.684483	10	1.1	0.0131304
Djibouti	Lower-Middle income	2648.5	1172.64	-7.85306	0.377572	713.2	0.608202	4.5	0.00383751	0	100.635	0	0	29	1.29	0
Dominican Republic	Upper-Middle income	7532.8	13143	-11.8788	0.132753	2044.6	0.155566	151.8	0.0115499	937	72.2525	4.89013	0.277475	22	1.22	0.0449395
East Timor	Lower-Middle income	1356.44	2070.57	-23.962	0.737224	142.2	0.0686768	1	0.000482959	181.8	44.0248	48.8683	0.559752	67	1.67	0.689147
Ecuador	Upper-Middle income	6202.14	22593.7	-5.87935	0.161235	1440.8	0.0637701	28.6	0.00126584	2822.2	34.0261	9.39188	0.659739	36	1.36	0.144667
Egypt	Lower-Middle income	2938.1	146336	-0.409251	0.340356	24034.6	0.164242	671	0.00458533	20879.4	54.3241	19.0924	0.456759	54	1.54	0.23941
El Salvador	Upper-Middle income	4008.8	6428.9	-11.9431	0.249451	1206.8	0.187715	240.6	0.0374247	837	66.9255	7.55569	0.330745	4	1.04	0.085805
Equatorial Guinea	Upper-Middle income	8454.26	1726.78	-0.626401	0.118284	NA	NA		NA	NA	NA	NA	#VALUE!	93	1.93	#VALUE!
Estonia	High income	20545.1	1145.18	-0.908279	0.0486735	134	0.117012	509.6	0.444996	655.8	47.823	20.1362	0.52177	-12	0.88	0.0223488
eSwatini	Lower-Middle income	3717.44	NA	-23.5927	0.269002	NA	NA	3.2	NA	83.4	0	1.12837	1	NA	#VALUE!	#VALUE!
Ethiopia	Low income	738.08	181435	-8.25376	1.35487	2284.4	0.0125907	63.8	0.000351642	14517.8	13.6477	27.6928	0.863523	74	1.74	2.03573
Eritrea	NA	NA	9967.31	-13.9562	NA	NA	NA	NA	NA	NA	NA	NA	#VALUE!	NA	NA	#VALUE!
Finland	High income	46329.1	5745.68	-5.08471	0.0215847	446.4	0.0776932	227.6	0.0396124	805.4	43.5852	9.13336	0.564148	4	1.04	0.012664
France	High income	38909.8	70831.4	-5.62615	0.0257004	6455.4	0.0911375	26809.4	0.378496	51050	21.0301	29.2531	0.789699	9	1.09	0.0221222
Gabon	Upper-Middle income	7201.44	3039.09	-5.15605	0.138861	60.45	0.0198908	0.6	0.000197427	50.6	54.7306	2.92668	0.452694	69	1.69	0.106236
Gambia	Low income	658.12	4687.45	-5.32995	1.51948	241.2	0.0514566	0.7	0.000149335	66	78.6949	14.8592	0.213051	121	2.21	0.715435
Georgia	Upper-Middle income	4370.26	3544.29	-12.476	0.228819	796.8	0.224812	28.4	0.00801288	308.4	73.997	10.879	0.26003	-11	0.89	0.0529548
Germany	High income	44527.3	75417.3	-3.44	0.0224581	17555.2	0.232774	13996.6	0.185589	27919.2	55.7701	17.5275	0.442299	-6	0.94	0.00933722
Ghana	Lower-Middle income	1991.66	48116.6	-17.7541	0.502094	2322.2	0.0482619	129.6	0.00269346	3038.6	44.3913	5.16539	0.556087	68	1.68	0.469069
Greece	High income	18698.2	9844.17	-5.79435	0.0534811	2640	0.268179	764.8	0.0776906	3026	53.8644	16.2526	0.461356	-10	0.9	0.0222065
Greenland	High income	50267.6	NA	-3.03374	0.0198935	NA	NA		NA	NA	NA	NA	#VALUE!	NA	NA	#VALUE!
Guatemala	Upper-Middle income	4351.1	26881.8	-8.24745	0.229827	2141	0.079645	186.6	0.0069415	1977	54.459	4.11255	0.45541	58	1.58	0.165372
Guinea	Lower-Middle income	861.74	26026.1	-24.5759	1.16044	1494	0.0574039	0.4	1.53692e-05	3060.6	32.8049	21.2671	0.671951	96	1.96	1.52833
Guinea-Bissau	Low income	691.82	3408.95	-1.89521	1.44546	142.6	0.0418311	0	0	188.2	43.1076	15.3935	0.568924	76	1.76	1.44735
Guyana	High income	6073.4	812.524	-13.3833	0.164652	103.2	0.127012	292.6	0.360113	636.2	23.0976	20.8499	0.769024	5	1.05	0.132953
Haiti	Lower-Middle income	1388.68	14023.7	-15.3147	0.720108	1235.4	0.0880936	1.2	8.55693e-05	400.8	75.5596	8.26748	0.244404	28	1.28	0.225276
Honduras	Lower-Middle income	2386.62	11057.3	-20.3984	0.419003	1342.2	0.121386	5521.22	0.49933	712	-38.7133	5.18346	1.38713	33	1.33	0.773013
Hungary	High income	14730.9	8453.85	-26.9298	0.0678847	1119.6	0.132437	6187.8	0.73195	13202.4	13.7641	63.5951	0.862359	-14	0.86	0.0503452
Iceland	High income	65970.8	386.536	-0.134536	0.0151582	117.8	0.304758	0.333333	0.000862361	NA	NA	NA	#VALUE!	16	1.16	#VALUE!
India	Lower-Middle income	1857.42	1.68693e+06	-1.658	0.538381	1973.6	0.00116993	18323.2	0.0108618	301589	0.691911	19.4219	0.993081	26	1.26	0.673667
Indonesia	Upper-Middle income	3755.02	319958	-2.16227	0.26631	16114.8	0.0503653	632.2	0.00197588	82036	16.5248	15.1223	0.834752	21	1.21	0.268986
Iran	Upper-Middle income	4674.86	92192.5	-1.72077	0.21391	12605.4	0.136729	456.8	0.00495485	16992.4	43.2566	22.4321	0.567434	14	1.14	0.138373
Iraq	Upper-Middle income	4934	78898.5	-1.62977	0.202675	5766.2	0.0730838	0.75	9.50588e-06	3533.4	62.0098	42.8272	0.379902	104	2.04	0.157073
Ireland	High income	71081.9	5718.41	-0.0217069	0.0140683	3484.2	0.609295	888.6	0.155393	625.8	108.158	4.03202	0	20	1.2	0
Israel	High income	40374.2	12222.9	-2.4283	0.0247683	4828.2	0.395014	51	0.00417251	195.8	97.0883	2.85999	0.0291172	47	1.47	0.00106014
Italy	High income	32381.2	57046.5	-7.03445	0.0308822	16952	0.297161	5822.2	0.102061	16391.6	61.5957	20.8602	0.384043	-5	0.95	0.0112671
Ivory Coast	Lower-Middle income	2128.08	46020.2	-10.8408	0.469907	2954.6	0.0642022	8638.83	0.187718	45941.2	7.33935	140.737	0.926606	93.1526	1.93153	0.841023
Jamaica	Upper-Middle income	5318.82	2744.01	-10.1382	0.188012	783.4	0.285494	26	0.00947517	2.2	103.133	0.0968472	0	-2	0.98	0
Japan	High income	38667.5	109262	-0.0943276	0.0258615	26345.8	0.241125	340.6	0.00311727	11149.6	70.9082	18.5002	0.290918	-13	0.87	0.00654552
Jordan	Lower-Middle income	4089.38	11375.2	-2.12267	0.244536	2904.4	0.255328	112.2	0.0098636	21.4	103.227	0.630558	0	45	1.45	0
Kazakhstan	Upper-Middle income	9419.68	22109.6	-7.32888	0.106161	406.6	0.0183902	7714.8	0.348935	15322.6	5.07337	32.0398	0.949266	23	1.23	0.123953
Kenya	Lower-Middle income	1710.14	90863.9	-8.43921	0.584747	3935.6	0.0433131	92.6	0.00101911	3971	50.366	10.9008	0.49634	87	1.87	0.542737
Kosovo	Upper-Middle income	4017.98	NA	-12.3774	0.248881	NA	NA		NA	NA	NA	NA	#VALUE!	NA	#VALUE!	#VALUE!
Kuwait	High income	29655.7	5807.43	-2.08876	0.0337203	1028.2	0.177049	135.8	0.0233838	9.8	113.966	1.12615	0	42	1.42	0
Kyrgyzstan	Lower-Middle income	1248.84	8101.26	-8.6991	0.800743	453.8	0.056016	8.4	0.00103688	1346.2	25.3293	17.0549	0.746707	32	1.32	0.789255
Laos	Lower-Middle income	2405.18	9969.59	-33.6199	0.415769	126.6	0.0126986	261.4	0.0262197	5102.8	2.54831	26.1871	0.974517	42	1.42	0.575347
Latvia	High income	15912.3	1622.13	-5.4138	0.0628443	979.8	0.604021	2459.2	1.51603	2052.8	170.875	37.8917	0	-17	0.83	0
Lebanon	Lower-Middle income	8561.24	5588.98	-3.90906	0.116806	1527	0.273216	54.4	0.00973344	138.8	94.7623	3.7642	0.0523768	-6	0.94	0.00575083
Lesotho	Lower-Middle income	1078.94	2909.87	-32.1758	0.926836	307.8	0.105778	40.4	0.0138838	84.8	87.3935	17.0775	0.126065	33	1.33	0.155399
Liberia	Low income	698.92	8970.29	-9.65662	1.43078	508.8	0.0567206	5.65	0.000629857	284	64.6383	14.0911	0.353617	90	1.9	0.961302
Libya	Upper-Middle income	9744.46	8279.58	-10.0371	0.102622	2114.2	0.255351	11.35	0.00137084	191.6	92.1441	7.18017	0.0785591	29	1.29	0.0103999
Lithuania	High income	16991.9	NA	-8.02938	0.0588515	NA	NA	4587.78	NA	3844.3	0	34.6078	1	NA	#VALUE!	#VALUE!
Madagascar	Low income	489.7	52186.8	-6.43046	2.04207	960.6	0.0184069	1.8	3.44914e-05	4157	18.7771	27.2252	0.812229	104	2.04	3.3836
Malawi	Low income	524.24	40437.8	-11.9531	1.90752	274.6	0.00679068	30.2	0.000746826	3214.4	7.93917	10.1354	0.920608	121	2.21	3.88094
Malaysia	Upper-Middle income	10288.2	40217.5	-9.50246	0.0971985	9225.6	0.229393	1043.4	0.0259439	2698	84.7926	2.06879	0.152074	29	1.29	0.019068
Mali	Low income	793.18	42469.3	-0.711248	1.26075	624.6	0.0147071	3.8	8.94764e-05	6098.4	9.29575	28.9386	0.907043	127	2.27	2.59586
Mauritania	Lower-Middle income	1665.48	7687.8	-3.36971	0.600428	732.6	0.0952939	0.2	2.60153e-05	259.2	73.8806	13.2458	0.261194	80	1.8	0.282291
Mexico	Upper-Middle income	9901.82	162302	-7.13237	0.100992	26353.2	0.162372	3495	0.021534	31179	48.7686	15.9144	0.512314	25	1.25	0.0646742
Moldova	Upper-Middle income	3522.9	3338.68	-29.706	0.283857	105	0.0314496	1031.6	0.308985	2896.2	5.33103	50.4239	0.94669	-18	0.82	0.220354
Mongolia	Upper-Middle income	3975.66	3957.44	-13.9849	0.251531	306	0.0773228	30.2	0.0076312	350.4	48.8662	11.8257	0.511338	30	1.3	0.167202
Montenegro	Upper-Middle income	7822.82	581.271	-2.28171	0.127831	280.6	0.482735	10	0.0172037	5	101.814	1.4058	0	-7	0.93	0
Morocco	Lower-Middle income	3310.4	43311.9	-18.6348	0.302078	8317.2	0.19203	63.4	0.0014638	6010.8	58.3066	21.8979	0.416934	23	1.23	0.154915
Mozambique	Low income	505.3	61602.2	-11.9042	1.97902	1914	0.0310703	2267.6	0.0368104	1580.35	156.022	8.33524	0	108	2.08	0
Myanmar	Lower-Middle income	1268.92	63489.3	-11.6891	0.788072	634.2	0.00998908	499.2	0.00786274	28619.6	2.20556	45.5362	0.977944	16	1.16	0.894001
Namibia	Upper-Middle income	5169.56	4170.16	-7.15597	0.19344	720.6	0.172799	18.6	0.00446026	62.8	94.2207	3.74646	0.0577929	62	1.62	0.0181107
Nepal	Lower-Middle income	1027.54	35892.8	-7.17031	0.973198	1724	0.0480319	726.8	0.0202492	9337.2	16.6821	31.4466	0.833179	23	1.23	0.997343
Netherlands	High income	49085.7	17653.7	-4.1672	0.0203725	21964.6	1.24419	5028	0.284813	1232.6	120.889	2.5859	0	4	1.04	0
New Zealand	High income	41526.6	5549.78	0	0.0240809	941.2		135.2		609.4	66.4971	2.05681	0.335029	20	1.2	0.00968137
Nicaragua	Lower-Middle income	2023.92	7782.44	-26.4988	0.494091	670.2	0.086117	326	0.0418892	796.4	58.7585	5.64566	0.412415	25	1.25	0.254713
Niger	Low income	522.2	65727.3	-2.06605	1.91498	981.6	0.0149344	13.6	0.000206916	148.6	87.9097	0.849207	0.120903	204	3.04	0.703838
Nigeria	Lower-Middle income	2245.22	376762	-6.09967	0.445391	5927.6	0.015733	63.8	0.000169338	19778.2	23.1168	8.465	0.768832	96	1.96	0.671164
North Korea	NA	NA	26972.1	-0.53304	NA	967.5		0.5		4670.25	17.1626	34.6445	0.828374	6	1.06	#VALUE!
North Macedonia	Upper-Middle income	5528.16	NA	-10.9243	0.180892	NA	NA	80.6	NA	411.2	0	14.8465	1	NA	#VALUE!	#VALUE!
Norway	High income	76206.5	6557.87	-1.2588	0.0131222	3573	0.544841	47.8	0.00728895	358.6	91.9975	4.21707	0.0800247	23	1.23	0.00129163
Oman	High income	18536.4	5732.76	-14.0768	0.0539479	2027.2	0.353617	6265	1.09284	13.4	-47.9879	0.493193	1.47988	22	1.22	0.0974004
Pakistan	Lower-Middle income	1503.22	301054	-1.07956	0.665239	1344	0.00446432	1193.6	0.00396474	42504.6	3.15086	17.0027	0.968491	53	1.53	0.985745
Panama	High income	15173.3	5500.56	-5.25928	0.0659051	960	0.174528	6	0.0010908	448.2	68.4638	7.528	0.315362	36	1.36	0.0282661
Papua New Guinea	Lower-Middle income	2501.6	12790.3	0	0.399744	621.2	0.0485679	828.6	0.0647833	13.8	-320.868	0.118052	4.20868	61	1.61	2.70865
Paraguay	Upper-Middle income	5961.46	8779.88	-7.7612	0.167744	107.4	0.0122325	8401.8	0.956938	16853.2	1.25485	65.2448	0.987452	29	1.29	0.213675
Peru	Upper-Middle income	6577.66	41333.6	-4.94601	0.15203	6260	0.151451	188.8	0.00456771	5021.2	56.435	9.8227	0.43565	29	1.29	0.0854389
Philippines	Lower-Middle income	3139.68	145104	-10.3139	0.318504	9390.4	0.0647148	227.6	0.00156853	26268.6	26.503	24.1323	0.73497	40	1.4	0.327727
Poland	High income	13991.8	33793.9	-6.31607	0.0714705	3206	0.0948693	5684	0.168196	14637.8	26.3656	14.3536	0.736344	-12	0.88	0.0463117
Portugal	High income	21525.2	9335.52	-18.7045	0.0464572	6198	0.663916	803	0.0860156	997	96.965	8.19965	0.0303504	-9	0.91	0.0012831
Qatar	High income	62790.3	3152.04	-2.36043	0.015926	1479	0.46922	0	0	1	99.9324	0.399776	0.000675676	35	1.35	1.45271e-05
Republic of Serbia	Upper-Middle income	6463.26	7473.77	-30.1092	0.154721	128.4	0.0171801	3214.2	0.430064	9412.8	2.0294	52.3845	0.979706	-15	0.85	0.128844
Republic of the Congo	Lower-Middle income	2402.92	NA	-1.40636	0.41616	NA	NA	0	NA	3653.04	0	100.611	1	NA	#VALUE!	#VALUE!
Romania	High income	10912.4	15584.8	-16.6108	0.0916392	3192.2	0.204828	11180.8	0.717418	23821.6	20.1617	64.3084	0.798383	-19	0.81	0.0592622
Russia	High income	10312.4	129778	-6.86423	0.0969708	3746.4	0.0288677	37040.6	0.285414	91652.6	6.41964	25.3151	0.935804	-9	0.91	0.0825785
Rwanda	Low income	758.86	20471.7	-21.4378	1.31777	549.6	0.0268469	104.2	0.00508996	535	56.0588	5.197	0.439412	68	1.68	0.972792
Saudi Arabia	High income	21772.9	45308.8	-0.449488	0.0459286	10484.2	0.231394	403.6	0.00890775	662.2	97.5928	5.42033	0.0240719	38	1.38	0.00152572
Senegal	Lower-Middle income	1372.18	34020.9	-2.67551	0.728767	2763.2	0.0812207	34.6	0.00101702	1435	66.3656	11.0942	0.336344	112	2.12	0.519646
Sierra Leone	Low income	521.48	11000.1	-46.8825	1.91762	609.2	0.0553811	3.2	0.000290906	926.2	39.7598	16.2263	0.602402	63	1.63	1.88294
Slovakia	High income	17881.6	4964.87	-8.24424	0.0559235	719.2	0.144858	1943.6	0.39147	3460.2	32.1675	43.8136	0.678325	-9	0.91	0.0345203
Slovenia	High income	23649.7	1961.64	-3.97523	0.0422838	1251.2	0.637834	723.4	0.368773	483.8	123.685	24.4657	0	-5	0.95	0
Somalia	Low income	541.3	25269.6	-13.1342	1.8474	1123.6	0.0444645	186.4	0.00737646	84.8	109.941	2.48278	0	121	2.21	0
Somaliland	NA	NA	NA	-43.28	#VALUE!								1			#VALUE!
South Africa	Upper-Middle income	6488.94	64840.5	-7.41098	0.154108	5901.8	0.0910203	2307	0.0355796	14555.4	32.5164	20.2733	0.674836	17	1.17	0.121677
South Korea	High income	30993.6	51247.6	-1.43056	0.0322647	17686.8	0.345125	299.8	0.00585003	5594	76.9627	16.5819	0.230373	1	1.01	0.00750724
South Sudan	Low income	1071.8	24612.9	-6.3741	0.93301	175	0.00711009	395.4	0.0160648	194	-662.879	2.39994	7.62879	88	1.88	13.3813
Spain	High income	28087.6	45163.7	-12.6413	0.0356029	19429.4	0.4302	2169	0.0480253	11573.4	67.3841	12.9342	0.326159	-2	0.98	0.0113799
Sri Lanka	Lower-Middle income	4185.94	21070.9	-27.1132	0.238895	1712.4	0.0812684	101	0.00479333	4272.6	29.1027	31.3425	0.708973	1	1.01	0.171064
Sudan	Low income	1909.48	76700.4	-11.9056	0.523703	2370.6	0.0309073	101.6	0.00132463	705.2	79.7055	2.25149	0.202945	82	1.82	0.193435
Suriname	Upper-Middle income	6829.38	624.134	-20.8096	0.146426	62.4	0.0999786	4.33333	0.00694296	276.6	18.6454	52.0345	0.813546	13	1.13	0.134611
Sweden	High income	52766.1	11696	-6.79077	0.0189515	1017.4	0.0869868	1140.8	0.0975374	2914.2	36.4555	19.4392	0.635445	18	1.18	0.0142103
Switzerland	High income	83510.6	9915.54	-0.897888	0.0119745	1533.2	0.154626	198.4	0.020009	638.2	77.7091	7.1693	0.222909	17	1.17	0.003123
Syria	Low income	924.1	34118.2	-6.0744	1.08213	2179	0.0638663	19	0.000556888	2294.2	48.9201	21.146	0.510799	78	1.78	0.9839
Taiwan	NA	NA	NA	-1.82683	NA	9007.2		240.8		1940.6	84.1244	14.5169	0.158756	NA	NA	#VALUE!
Tajikistan	Lower-Middle income	871.18	13828.1	-0.905298	1.14787	1203	0.0869967	14329	1.03622	1180.4	-10.0707	14.4455	1.10071	56	1.56	1.97101
Thailand	Upper-Middle income	6550.66	63711.3	-11.4853	0.152656	7643.8	0.119976	837.2	0.0131405	35435.8	18.0951	15.0751	0.819049	-7	0.93	0.116281
Togo	Low income	819.56	14863.6	-11.0433	1.22017	339	0.0228074	34.2	0.00230092	999.4	25.9929	19.946	0.740071	93	1.93	1.74281
Tunisia	Lower-Middle income	3676.34	13400	-17.5144	0.27201	4198.4	0.313312	149.6	0.0111641	1094.8	81.6238	9.19357	0.183762	17	1.17	0.0584826
Turkey	Upper-Middle income	10300	95096	-4.38668	0.0970878	27585.4	0.29008	7465.2	0.0785018	27907.2	57.4368	16.9079	0.425632	18	1.18	0.0487619
Turkmenistan	Upper-Middle income	6558.46	6533.05	-0.362254	0.152475	233.6	0.0357566	164.5	0.0251797	1578.8	14.1756	21.4243	0.858244	19	1.19	0.155724
Uganda	Low income	800.04	95434.8	-20.6019	1.24994	897.8	0.00940747	469.2	0.00491644	3149.6	25.0908	8.80501	0.749092	129	2.29	2.14417
Ukraine	Upper-Middle income	2741.76	35896.2	-14.4658	0.364729	305.8	0.00851901	42413	1.18155	60039.8	1.70527	44.6332	0.982947	-19	0.81	0.290393
United Arab Emirates	High income	43548.4	12579.9	-0.209635	0.0229629	2930.4	0.232942	708.2	0.056296	12.2	131.149	0.530744	0	34	1.34	0
United Kingdom	High income	42477.6	74642.1	-5.00988	0.0235418	11022.2	0.147667	3359.4	0.0450068	15173.2	48.2668	21.4866	0.517332	14	1.14	0.013884
United Republic of Tanzania	Lower-Middle income	982.22	NA	-9.13992	1.0181	NA	NA	4733.15	NA	8909.4	0	17.5916	1	NA	#VALUE!	#VALUE!
United States of America	High income	60496.2	384447	-5.07401	0.01653	13112	0.0341062	134385	0.349555	543232	3.10741	59.4319	0.968926	18	1.18	0.0188993
Uruguay	High income	17981.7	3666.67	-14.7073	0.0556121	689	0.187909	2983.2	0.8136	5200.6	23.7063	50.8496	0.762937	6	1.06	0.0449742
Uzbekistan	Lower-Middle income	2155	36950.5	-1.03513	0.464037	3553.8	0.0961772	524.4	0.0141919	7096.4	35.0965	15.7618	0.649035	20	1.2	0.361412
Venezuela	NA	NA	41022	-8.45943	NA	3690		8731.4		2040.4	NA	10.8695	#VALUE!	29	1.29	#VALUE!
Vietnam	Lower-Middle income	3021.26	112148	-10.0457	0.330988	16621.6	0.148212	496.1	0.00442363	48883	25.5683	37.7628	0.744317	18	1.18	0.290704
Western Sahara	NA	NA	NA	-26.9511		NA		NA		NA	NA	NA	#VALUE!	NA	NA	#VALUE!
Yemen	Low income	969.48	45798.6	-10.0654	1.03148	4500.2	0.0982607	74	0.00161577	141.8	98.5158	3.31429	0.0148424	63	1.63	0.0249547
Zambia	Lower-Middle income	1359.38	39956.8	-21.7943	0.735629	96.6	0.00241761	392	0.0098106	3184.6	3.34349	20.6745	0.966565	132	2.32	1.6496
Zimbabwe	Lower-Middle income	1543.06	28419.7	-17.0933	0.648063	1108.6	0.0390082	9.4	0.000330757	1102.4	50.3543	11.8033	0.496457	74	1.74	0.55982

## Sheet: Meta data
Country Name	Country Name
Classification	World Bank Country-level Classification
GDP per capita	Gross Domestic Production per capita
Population 2045_2049	Mean country-level population between 2025 and 2049
MR	% reduction by drought
GDP_Factor	GDP factor in equation 3
Big 4 Imports (1000 t)	Summed import total in 1000 t of maize, rice, soybean, and wheat per country
Big 4 Imports per Capita	Calculated Imports per Capita of maize, rice, soybean, and wheat per country
Big 4 Exports (1000 ha)	Summed export total in 1000 t of maize, rice, soybean, and wheat per country
Big 4 Exports per Capita	Calculated Exports per Capita of maize, rice, soybean, and wheat per country
Big 4 Total Production	Total Production of maize, rice, soybean, and wheat per country
Big 4 Import Fraction	Import fraction of maize, rice, soybean, and wheat per country
Big 4 Production Fraction	Production fraction of maize, rice, soybean, and wheat per country
GDP_Import_Factor	Import factor in equation 3
Population_Change	Population change from 2015-2019 and 2045-2049
Population_factor	popualtion growth factor in equation 3
VI	conomic vulnerability index
